# Supplementary material
Source: PubMed Central journal article supplement (PMC3970526)
Supplement: 1324136111_pnas.201324136SI.pdf [file 1324136111_pnas.201324136SI.pdf]

# Supporting Information

Gorrini et al. 10.1073/pnas.1324136111

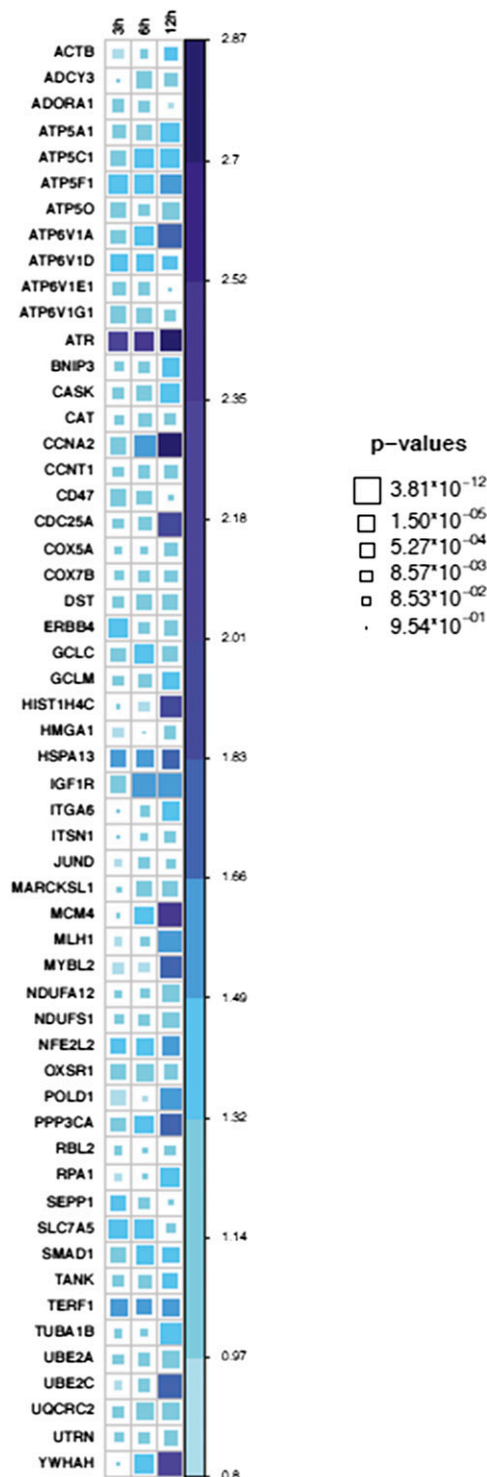

**Fig. S1.** E2 regulates various reactive oxygen species (ROS)-related pathways. MCF7 cells were treated with 100 nM E2 for 0, 3, 6, or 12 h. At each time point, mRNA levels of the indicated ROS-related genes were measured by microarray analysis. Data are the fold change calculated relative to the mRNA level in the control group (0 h; set to 1). Statistical significance was determined at a false discovery rate of 5%. Data are available from the NCBI GEO database (accession no. GSE11324).

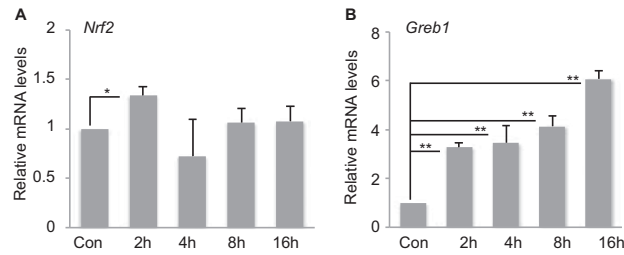

**Fig. S2.** E2 does not affect NRF2 mRNA expression. (A and B) HC11 were E2-treated for different times as indicated. NRF2 (A) and GREB1 (B) mRNA levels were analyzed. Error bars illustrate standard error. \* $P < 0.05$  and \*\* $P < 0.01$ .

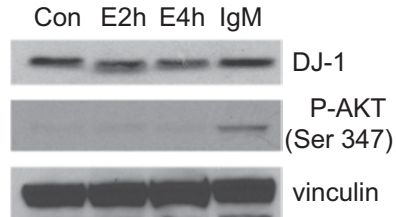

**Fig. S3.** E2 does not activate PI3K signaling in B cells. Freshly isolated B cells were E2 treated or stimulated with IgM. AKT phosphorylation and DJ-1 accumulation were analyzed by Western blotting. Vinculin, loading control.

**Table S1. Detailed analysis of GOTERM\_BP\_FAT annotation cluster of E2-regulated genes shown in Fig. S1**

| Term                                                                                | Count | Percent     | P value     | Benjamini   |
|-------------------------------------------------------------------------------------|-------|-------------|-------------|-------------|
| GO:0006796~phosphate metabolic process                                              | 18    | 32.72727273 | 6.36E-08    | 1.00E-05    |
| GO:0006793~phosphorus metabolic process                                             | 18    | 32.72727273 | 6.36E-08    | 1.00E-05    |
| GO:0016310~phosphorylation                                                          | 16    | 29.09090909 | 1.90E-07    | 2.25E-05    |
| GO:0007049~cell cycle                                                               | 13    | 23.63636364 | 2.87E-05    | 0.001045501 |
| GO:0006091~generation of precursor metabolites and energy                           | 11    | 20          | 2.55E-07    | 2.68E-05    |
| GO:0006259~DNA metabolic process                                                    | 10    | 18.18181818 | 1.17E-04    | 0.003814571 |
| GO:0022402~cell cycle process                                                       | 10    | 18.18181818 | 2.68E-04    | 0.007433458 |
| GO:0042592~homeostatic process                                                      | 10    | 18.18181818 | 0.00204282  | 0.04849184  |
| GO:0006119~oxidative phosphorylation                                                | 9     | 16.36363636 | 3.29E-09    | 1.56E-06    |
| GO:0006163~purine nucleotide metabolic process                                      | 9     | 16.36363636 | 4.93E-07    | 3.60E-05    |
| GO:0006812~cation transport                                                         | 9     | 16.36363636 | 0.001139564 | 0.029579348 |
| GO:0022403~cell cycle phase                                                         | 9     | 16.36363636 | 1.66E-04    | 0.005067176 |
| GO:0015992~proton transport                                                         | 8     | 14.54545455 | 3.04E-09    | 2.88E-06    |
| GO:0006818~hydrogen transport                                                       | 8     | 14.54545455 | 3.83E-09    | 1.21E-06    |
| GO:0046034~ATP metabolic process                                                    | 8     | 14.54545455 | 1.39E-07    | 1.89E-05    |
| GO:0009205~purine ribonucleoside triphosphate metabolic process                     | 8     | 14.54545455 | 2.93E-07    | 2.78E-05    |
| GO:0009199~ribonucleoside triphosphate metabolic process                            | 8     | 14.54545455 | 3.11E-07    | 2.68E-05    |
| GO:0009144~purine nucleoside triphosphate metabolic process                         | 8     | 14.54545455 | 3.90E-07    | 3.08E-05    |
| GO:0009141~nucleoside triphosphate metabolic process                                | 8     | 14.54545455 | 6.33E-07    | 4.29E-05    |
| GO:0009150~purine ribonucleotide metabolic process                                  | 8     | 14.54545455 | 9.00E-07    | 5.69E-05    |
| GO:0009259~ribonucleotide metabolic process                                         | 8     | 14.54545455 | 1.38E-06    | 7.68E-05    |
| GO:0006164~purine nucleotide biosynthetic process                                   | 8     | 14.54545455 | 1.44E-06    | 7.59E-05    |
| GO:0009165~nucleotide biosynthetic process                                          | 8     | 14.54545455 | 6.58E-06    | 2.71E-04    |
| GO:0034654~nucleobase, nucleoside, nucleotide and nucleic acid biosynthetic process | 8     | 14.54545455 | 8.39E-06    | 3.18E-04    |
| GO:0034404~nucleobase, nucleoside and nucleotide biosynthetic process               | 8     | 14.54545455 | 8.39E-06    | 3.18E-04    |
| GO:0015672~monovalent inorganic cation transport                                    | 8     | 14.54545455 | 2.00E-04    | 0.005916916 |
| GO:0044271~nitrogen compound biosynthetic process                                   | 8     | 14.54545455 | 2.29E-04    | 0.006554106 |
| GO:0015985~energy coupled proton transport, down electrochemical gradient           | 7     | 12.72727273 | 8.32E-09    | 1.97E-06    |
| GO:0015986~ATP synthesis coupled proton transport                                   | 7     | 12.72727273 | 8.32E-09    | 1.97E-06    |
| GO:0034220~ion transmembrane transport                                              | 7     | 12.72727273 | 2.95E-08    | 5.60E-06    |
| GO:0006754~ATP biosynthetic process                                                 | 7     | 12.72727273 | 1.09E-06    | 6.47E-05    |
| GO:0009206~purine ribonucleoside triphosphate biosynthetic process                  | 7     | 12.72727273 | 1.93E-06    | 9.61E-05    |
| GO:0009201~ribonucleoside triphosphate biosynthetic process                         | 7     | 12.72727273 | 2.04E-06    | 9.69E-05    |
| GO:0009145~purine nucleoside triphosphate biosynthetic process                      | 7     | 12.72727273 | 2.04E-06    | 9.69E-05    |
| GO:0009142~nucleoside triphosphate biosynthetic process                             | 7     | 12.72727273 | 2.44E-06    | 1.10E-04    |
| GO:0009152~purine ribonucleotide biosynthetic process                               | 7     | 12.72727273 | 5.41E-06    | 2.33E-04    |
| GO:0009260~ribonucleotide biosynthetic process                                      | 7     | 12.72727273 | 7.57E-06    | 2.99E-04    |
| GO:0006260~DNA replication                                                          | 7     | 12.72727273 | 8.44E-05    | 0.002853686 |
| GO:0000279~M phase                                                                  | 7     | 12.72727273 | 0.001568772 | 0.038410327 |
| GO:0000279~M phase                                                                  | 7     | 12.72727273 | 0.001568772 | 0.038410327 |
| GO:0042391~regulation of membrane potential                                         | 6     | 10.90909091 | 1.58E-04    | 0.004989659 |
| GO:0006261~DNA-dependent DNA replication                                            | 4     | 7.272727273 | 0.001423991 | 0.03585247  |
| GO:0051899~membrane depolarization                                                  | 4     | 7.272727273 | 5.93E-04    | 0.015941235 |
